# Supplementary material for: Fluorinated glycidyl azide polymers as potential energetic binders
Source: Royal Society of Chemistry journal article supplement (doi:10.1039/c7ra08929e), 2017-01-01
Supplement: c7ra08929e1.pdf [file c7ra08929e1.pdf]

## Supplementary Information

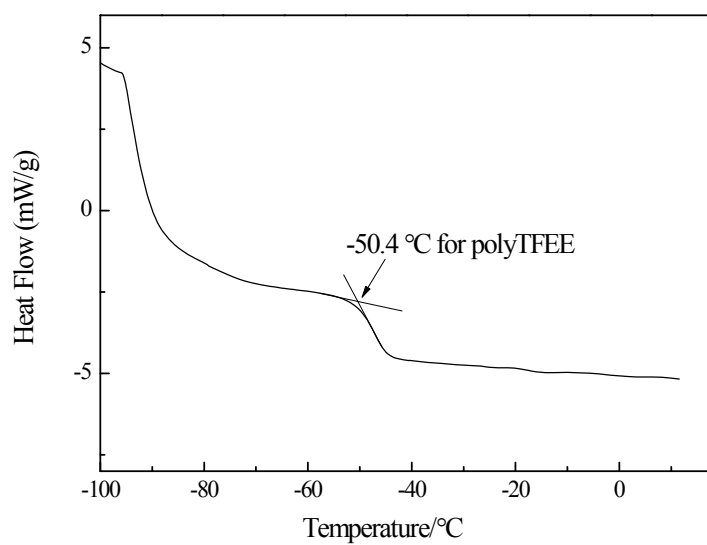

**Fig.S1** DSC cruve of polyTFEE

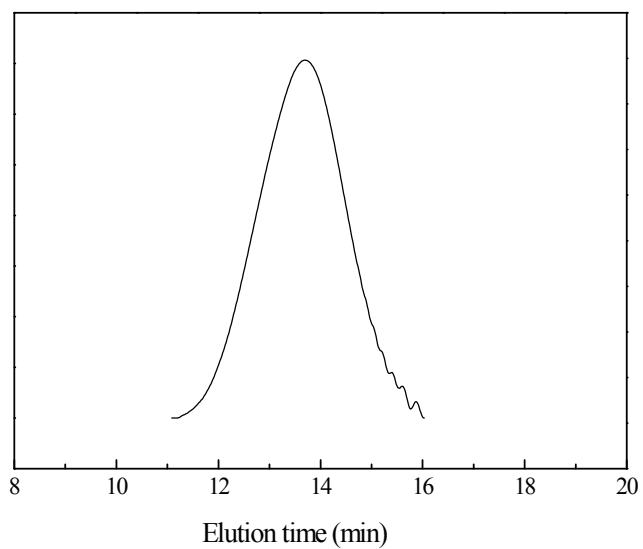

**Fig.S2** GPC elution curves of sample GAP

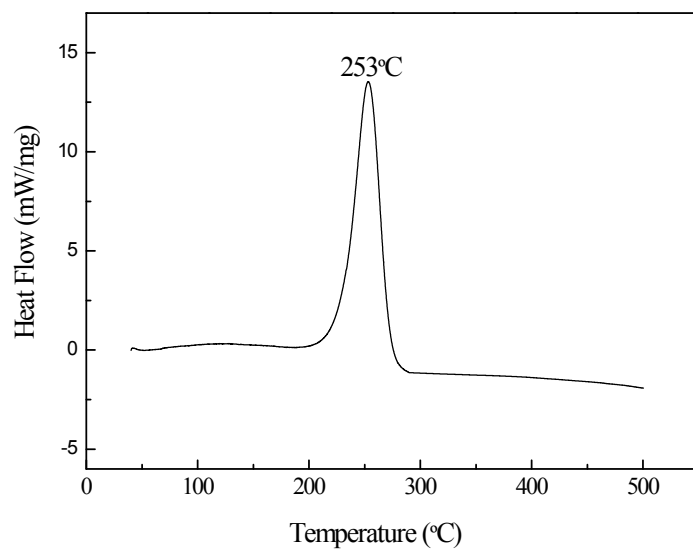

**Fig.S3** DSC cruve of sampe GAP.

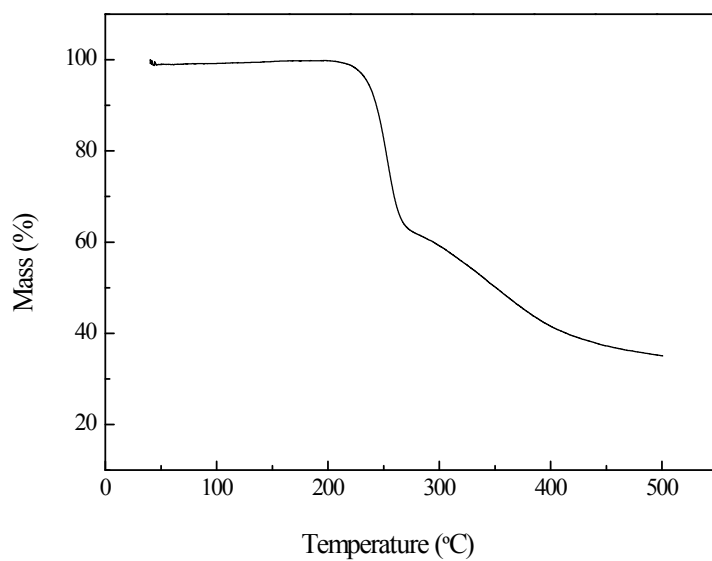

**Fig.S4** TGA cruve of sampe GAP.
